# Supplementary material
Source: MDPI journal article supplement (https://www.mdpi.com/2311-5637/10/2/99)
Supplement: s1 [file s1]

## Supplementary Files

**Table S1.** Primers used in this study

| Name   | Sequence                                    |
|--------|---------------------------------------------|
| SSA1-F | ACGGAATTCATGCCAGCTGTCGGTATTGAT              |
| SSA1-R | GTCTAAGGGCGGCCGCTCAATCGACTTCCTCAACAGTTGGTCC |
| YDJ1-F | ACGGAATTCATGGTTAGAGAAACAAAGTTATAT           |
| YDJ1-R | GTCTAAGGGCGGCCGCTCACTGAGAAGCACATTGGACACC    |
| SNL1-F | ACGGAATTCATGCTTGATTTATCCCCATTC              |
| SNL1-R | GTCTAAGGGCGGCCGCTCAAAGGTCTCCGAGAACAGCTTT    |
| PDI-F  | ACGGAATTCATGCAATTCAACTGGAATATT              |
| PDI-R  | GTCTAAGGGCGGCCGCTCAAAGCTCGTCGTGAGCGTCTGC    |
| BIP-F  | ACGGAATTCATGCTGTCGTTAAAACCATCT              |
| BIP-R  | GTCTAAGGGCGGCCGCTCACAACTCATCATGATCATAGTC    |
| LHS1-F | ACGGAATTCATGAGAACACAAAAGATAGTA              |
| LHS1-R | GTCTAAGGGCGGCCGCTCACAACTCATCATGGGATGTTTG    |
| SSO1-F | ACGGAATTCATGAGTAACCAGTATAATCCG              |
| SSO1-R | GTCTAAGGGCGGCCGCTCATCTTCCCCAGTTTCCGACACC    |
| qGAP-F | CCAGCGGCAACAAGATCAAC                        |
| qGAP-R | CTCCTCGTTGACACCGACAA                        |
| qES-F  | CCTTCCTACCTCCGTACCT                         |
| qES-R  | AGTTGTTGGACTGACTGCGG                        |

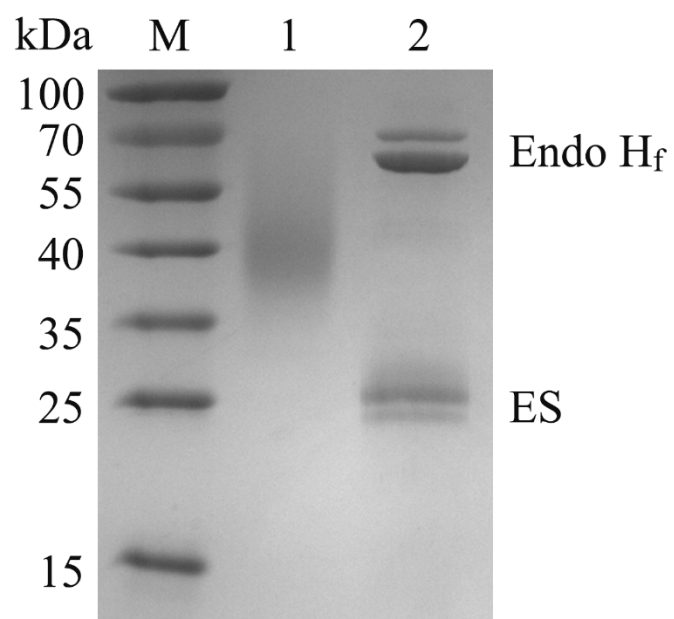

**Figure S1.** SDS-PAGE analysis of the deglycosylation for ES. Lane 1, purified ES; Lane 2, deglycosylated ES.

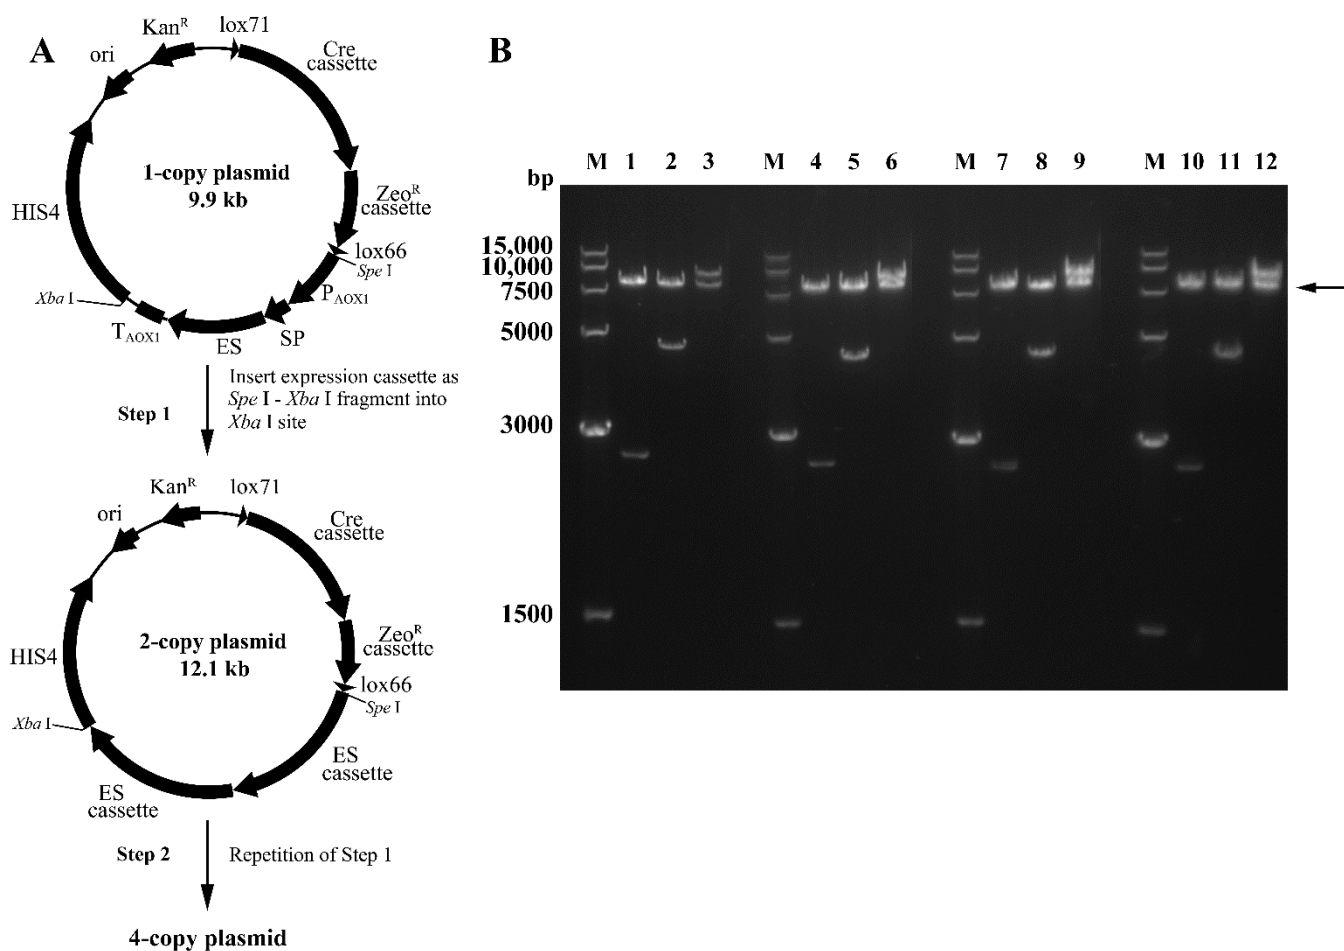

**Figure S2.** Construction and identification of the multicopy plasmids. (A) Schematic representation of multicopy plasmids construction. (B) Gel electrophoresis analysis of multicopy plasmids digested with *Spe* I and *Xba* I. Lanes 1-3, pMCO-n- $\alpha$ -ES ( $n = 1, 2, 4$ ); Lanes 4-6, pMCO-n- $\alpha$ d14-ES ( $n = 1, 2, 4$ ); Lanes 7-9, pMCO-n-OP-ES ( $n = 1, 2, 4$ ); Lanes 10-12, pMCO-n-cSP3-ES ( $n = 1, 2, 4$ ). The vector frame is indicated by an arrow.
